# Supplementary material for: The disodium salt of 2,5-dihydroxy-1,4-benzoquinone as anode material for rechargeable sodium ion batteries
Source: Royal Society of Chemistry journal article supplement (doi:10.1039/c4cc08220f), 2014-12-02
Supplement: c4cc08220f1.pdf [file c4cc08220f1.pdf]

## Disodium Salt of 2,5-dihydroxy-1,4-benzoquinone as Anode Material for Rechargeable Sodium Ion Batteries

Zhiqiang Zhu, Hao Li, Jing Liang, Zhanliang Tao and Jun Chen\*

Key Laboratory of Advanced Energy Materials Chemistry (Ministry of Education), Collaborative Innovation Center of Chemical Science and Engineering, Nankai University, Tianjin 300071, China.

### Corresponding Author

chenabc@nankai.edu.cn (J. C.)

### General synthetic route of disodium salt of 2,5-dihydroxy-1,4-benzoquinone

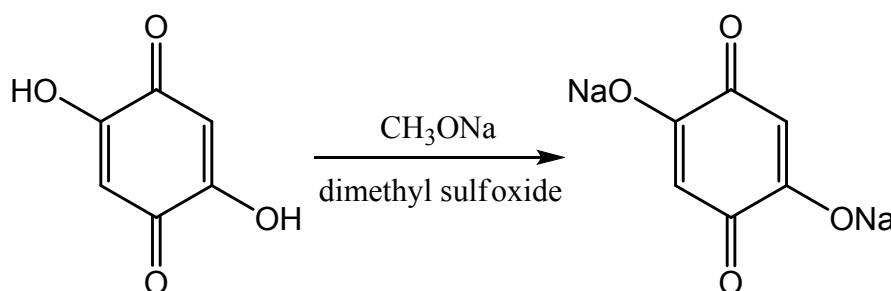

Disodium salt of 2,5-dihydroxy-1,4-benzoquinone (Na<sub>2</sub>DBQ) was synthesized through a simple one-pot solution method. Typically, 1 mmol 2,5-dihydroxy-1,4-benzoquinone (H<sub>2</sub>DBQ) was first dissolved in 20 ml of dimethyl sulphoxide (DMSO) solution. Then, 2 mmol sodium methylate was added into the mixture. After stirring for 48 h, the precipitate was filtered, washed with DMSO, and vacuum dried at 140 °C for 10 h to afford the dull red Na<sub>2</sub>DBQ. Yield: 96.6%. <sup>1</sup>H NMR (D<sub>2</sub>O-d<sub>2</sub>) 4.65 (2H, s, 3-6-H). Elem. Anal.: C,39.15; H,1.10 Found: C,40.03; H,0.86.

### Material characterization

The morphology of prepared Na<sub>2</sub>DBQ sample was characterized using field-emission scanning electron microscopy (SEM, FEI NanoSEM-430, 10 kV). FTIR spectra were collected by KBr pellets on a FTIR-650 spectrometer (Tianjin Gangdong) in wavelength range of 400–4000 cm<sup>-1</sup>. Thermalgravimetric (TG) analysis was carried

out on a TG-DSC analyzer (NETZSCH, STA 449 F3) from room temperature to 750 °C at a heating rate of 5 °C min<sup>-1</sup> under Ar atmosphere.

## Electrochemical Measurements.

Electrochemical performance was evaluated with CR2032 coin-type cells assembled in an argon-filled glove box (Mikrouna Universal 2440/750). The working electrode was fabricated by casting a mixture of Na<sub>2</sub>DBQ (60 wt%), conductive carbon (30 wt%), and PVdF binder (10 wt%) on copper sheets and vacuum dried at 110 °C for 12 h. 1 M NaClO<sub>4</sub> in a mixed solvent of ethylene carbonate (EC) and dimethyl carbonate (DMC) (1:1 in volume) was used as electrolyte. Glass fiber was used as separator. The charge-discharge experiments were carried out on a LAND battery testing system in the voltage window of 0.5-2.5 V at room temperature.

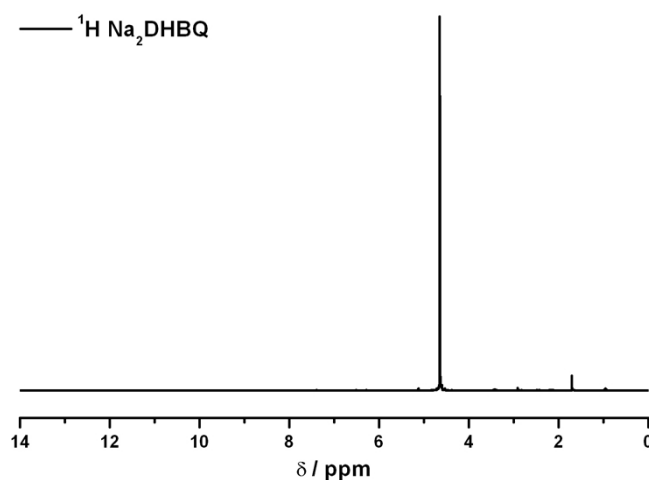

**Fig. S1** <sup>1</sup>H NMR spectrum of the as-prepared Na<sub>2</sub>DBQ.

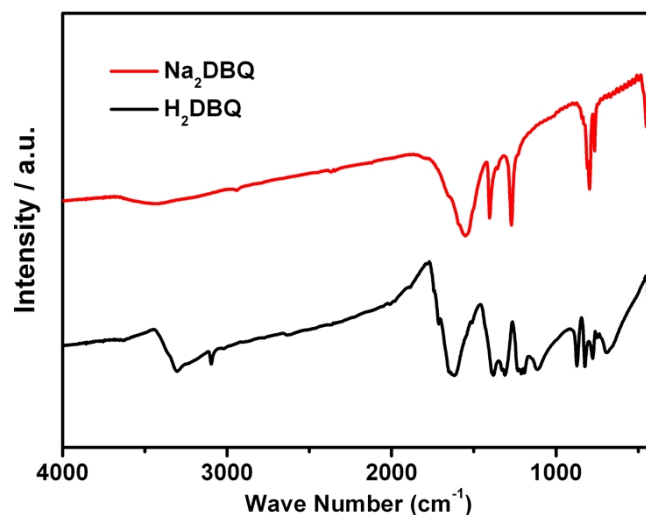

**Fig. S2** FTIR spectra of the  $\text{H}_2\text{DBQ}$  precursor and obtained  $\text{Na}_2\text{DBQ}$ . After the formation of  $\text{Na}_2\text{DBQ}$ , the peak originated from the O-H stretching ( $3305\text{ cm}^{-1}$ ) disappeared. Meanwhile, the stretching vibration of C=O bond shifts from  $1616\text{ cm}^{-1}$  to  $1550\text{ cm}^{-1}$ . The change trends derived from the salt formation are in good agreement of previous reported results.<sup>1</sup>

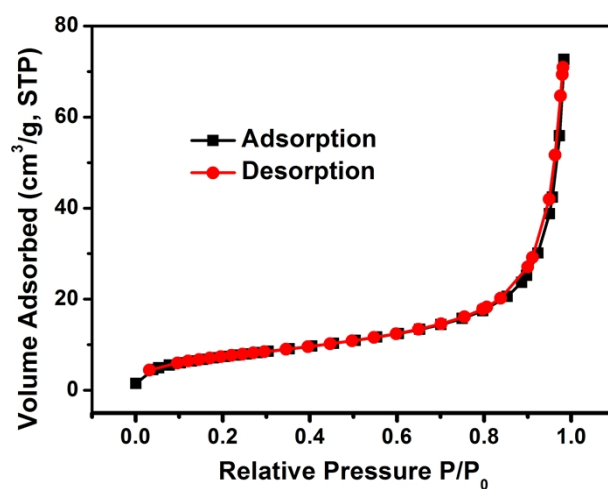

**Fig. 3** Nitrogen adsorption and desorption isotherm of  $\text{Na}_2\text{DBQ}$

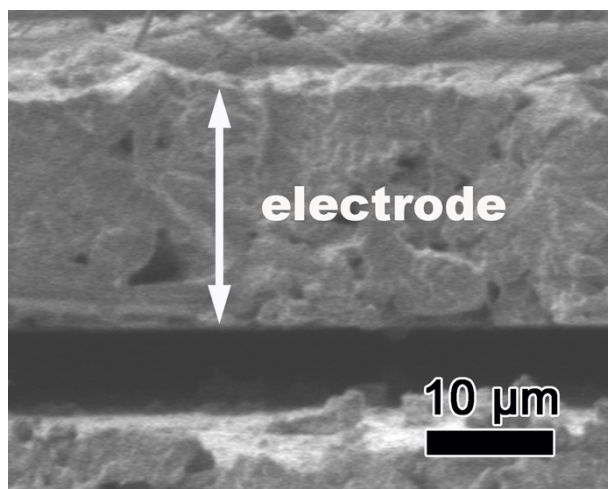

**Fig. S4** SEM image of the as-prepared electrode.

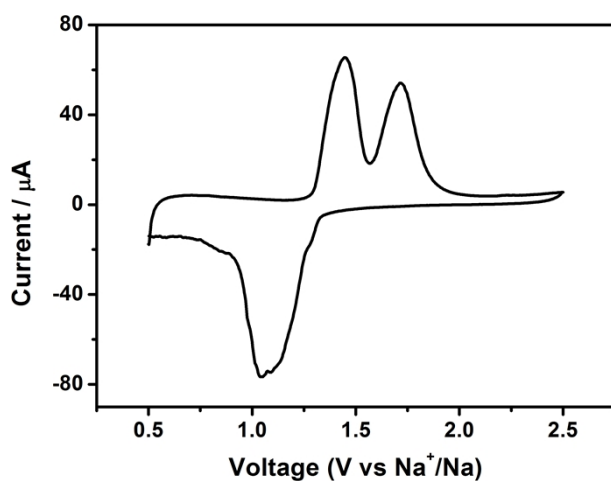

**Fig. S5** Cyclic voltammogram curve of  $\text{Na}_2\text{DBQ}$  between 0.5 and 2.5 V at a scan rate of 0.1 mV/s. Two overlapped peaks centered at 1.04 and 1.10 V are observed during the negative sweep, corresponding to the reduction of carbonyl to form sodium enolate. On the subsequent positive sweep, the peaks originated from the re-oxidation of the enolate groups are also found at 1.44 and 1.71 V, indicating good reversibility.

## Reference

1 S. Wang, L. Wang, Z. Zhu, Z. Hu, Q. Zhao and J. Chen, *Angew. Chem. Int. Ed.*, 2014, **53**, 5892.
